# Supplementary material for: Severe hail detection with C-band dual-polarisation radars using convolutional neural networks
Source: Copernicus journal article supplement (doi:10.5194/egusphere-2024-1336), 2024-05-22
Supplement: Supplementary file [file egusphere-2024-1336-RC3-supplement.pdf]

## Review for egusphere-2024-1336

The study aims to analyse the performance of convolutional neural networks (CNN) in discriminating between severe ( $> 2\text{cm}$ ) and non-severe ( $< 2\text{cm}$ ) hail cases. Different data sources are used as hail/non-hail observations (ESWD reports, ANELFA hailpads, user reports from MeteoFrance mobile app). A comprehensive pre-selection and quality control is performed on these data to construct training, validation and test dataset. Three CNN architectures are trained using radar-derived input features on images of different input sizes. The input features comprise (polarimetric) radar data as well as radar-based hail proxies. The performance of the trained CNNs in distinguishing between severe hail and rain/small hail events is compared against hail proxies. In addition, feature selection and feature importance are discussed comprehensively. It turns out, that Maximum Estimated Size of Hail (MESH) is the most important input feature of the CNN. The CNN is able to outperform all reference proxies for different verification metrics. However, the study also shows that the discussed hail proxies are able to achieve a similar performance compared to that of the CNN, if they are adjusted/tuned regarding value threshold and area threshold.

The study is very comprehensive and contains interesting results. The results are clearly and comprehensible presented. I appreciate the wise selection and filtering of reference data for severe and non-severe hail events. The approach is well explained and discussed. Also, the CNN model architecture selection and the analysis on feature importance sounds very reasonable. I strongly recommend the publication of the study. Some minor revisions that are proposed below could further improve the paper.

### General comments

The introduction gives a detailed overview on hail detection using remote sensing data, but the introduction on hail detection by in-situ measurements or eye-observations and the related issues (representativity, sensitivity on e.g. population density or time of day, ...) is somehow missing. That's unfortunate, as these aspects are well discussed in Section 2. In addition, the specific formulation of research questions could be beneficial to outline the story of the paper.

Section 2 is quite extensive. Potentially, the discussion on storm mode (sect. 2.5) can be moved to the appendix since it does not contribute to the main storyline of the paper.

In the conclusions (sect. 5), I would appreciate a more critical discussion on the (operational) applicability of the new CNN approach also with respect to its complexity compared to the much simpler hail proxies. This is a general discussion on the costs and benefits of AI systems in Nowcasting that occurs frequently.

### Minor comments

- ZDR-columns (Snyder et al., 2015) shall be introduced in Section 1 as a well-known precursor of hail
- The NWP perspective (i.e. environmental conditions) on hail/hail size forecasting could be shortly addressed in the introduction (e.g. Battaglioli et al., 2023)
- The details on the interpolation of polarimetric radar data on a 3D regular grid, particularly the discussion on the ROI, remains unclear. The notation "polarimetric grid" is very confusing (it's a regular grid 3D grid, not in polar coordinates?)
- Line 234: double "the"

## References

Snyder, J. C., A. V. Ryzhkov, M. R. Kumjian, A. P. Khain, and J. Picca, 2015: A ZDR Column Detection Algorithm to Examine Convective Storm Updrafts. *Wea. Forecasting*, 30, 1819–1844, <https://doi.org/10.1175/WAF-D-15-0068.1>.

Battaglioli, Francesco & Groenemeijer, Pieter & Tsonevsky, Ivan & Púčik, Tomáš. (2023). Forecasting large hail and lightning using additive logistic regression models and the ECMWF reforecasts. *Natural Hazards and Earth System Sciences*. 23. 3651-3669. 10.5194/nhess-23-3651-2023.
